# Supplementary material for: Controlled Self-Assembly of Conjugated Polymers via a Solvent Vapor Pre-Treatment for Use in Organic Field-Effect Transistors
Source: PubMed Central journal article supplement (PMC6419207; doi:10.3390/polym11020332), 2019-02-14
Supplement: polymers-11-00332-s001.pdf [file polymers-11-00332-s001.pdf]

Supporting Information

# Controlled Self-Assembly of Conjugated Polymers via a Solvent Vapor Pre-treatment for Use in Organic Field-Effect Transistors

Gyounglyul Jo <sup>1</sup>, Jaehan Jung <sup>2,\*</sup> and Mincheol Chang <sup>1,3,4,\*</sup>

<sup>1</sup>Department of Polymer Engineering, Graduate School, Chonnam National University, Gwangju 61186, South Korea

<sup>2</sup>Department of Materials Science and Engineering, Hongik University, Sejongsi 30016, South Korea

<sup>3</sup>School of Polymer Science and Engineering, Chonnam National University, Gwangju 61186, South Korea

<sup>4</sup>Alan G. MacDiarmid Energy Research Institute, Chonnam National University, Gwangju 61186, South Korea

\*Correspondence: jaehan@hongik.ac.kr (J.J.); mchang35@chonnam.ac.kr (M.C.); Tel.: +82-62-530-1771 (M.C.)

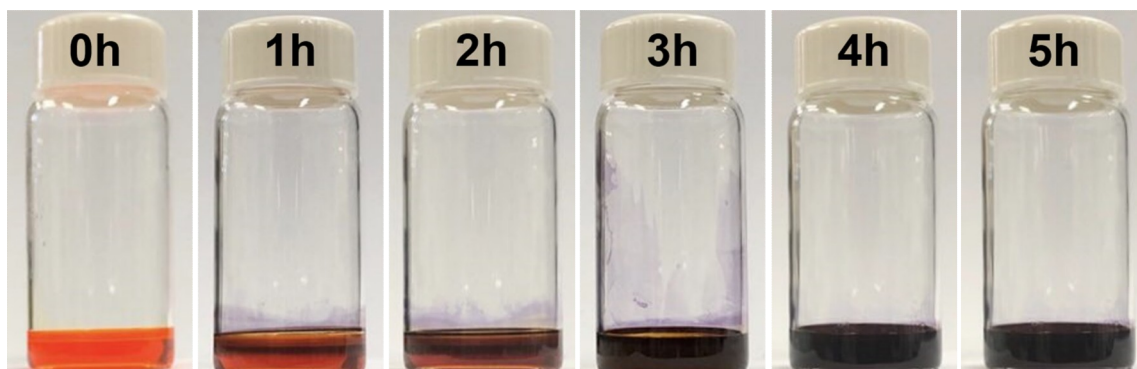

**Figure S1.** Photographs of P3HT/chloroform solutions in 20-mL vials after exposure to methanol vapor for 0, 1, 2, 3, 4, and 5 h.

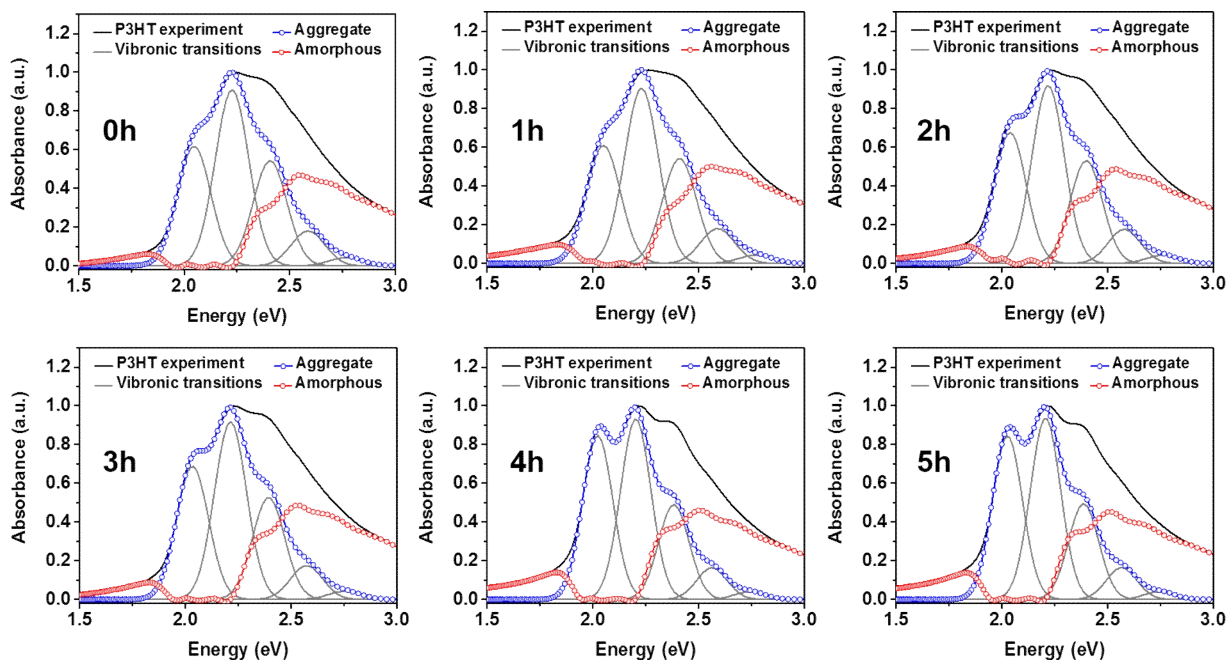

**Figure S2.** Absorption spectra of P3HT films spin-coated from solutions exposed to methanol vapor for 0, 1, 2, 3, 4, and 5 h. The blue and red solid lines depict the absorption spectra of P3HT aggregates and amorphous P3HT chains, respectively. The black lines represent the experimental absorption spectra.

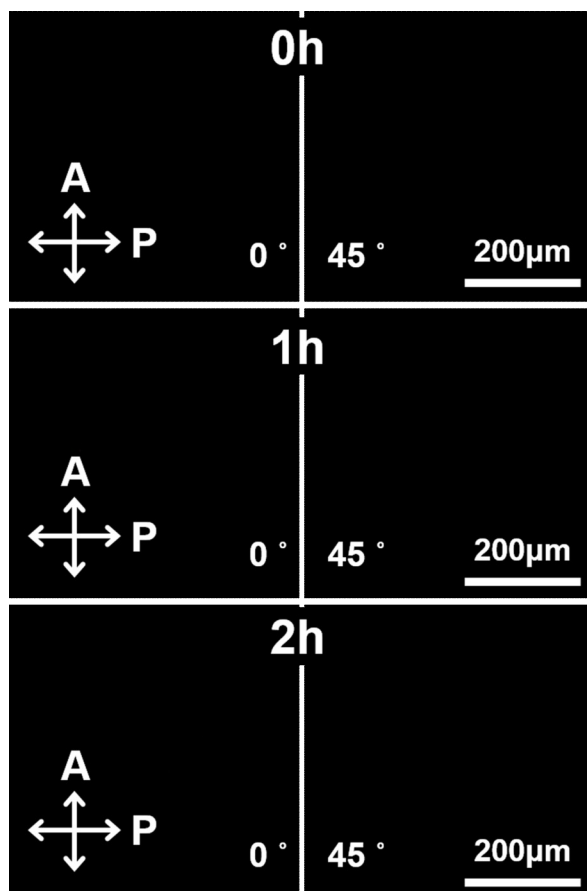

**Figure S3.** POM images of P3HT films spin-coated from solutions exposed to methanol vapor for 0, 1, and 2 h. **P** and **A** indicate the axes of the microscope polarizer and the light vibration plane, respectively.
